# Supplementary material for: Changing Ozone Sensitivity in the South Coast Air Basin during the COVID-19 Period
Source: Copernicus journal article supplement (doi:10.5194/acp-2022-178), 2022-03-16
Supplement: Supplementary file [file acp-2022-178-RC2-supplement.pdf]

Review of “ Changing Ozone Sensitivity in the South Coast Air Basin during the COVID-19 Period”

ACP

Current Due Date: 04 May 2022

*General Comments:*

Overall this is an interesting, multi-faceted, and comprehensive paper that is well written and adds to the ever-expanding body of literature on the impacts of the COVID-19 pandemic and lockdown on ozone pollution, in this case for the SoCAB region. While I think it does provide some important results that would be suitable for publication in ACP, I have a number of general and specific comments related to methods, analysis, and discussion/conclusions that need to be considered below. My formal recommendation is to reconsider the paper after major revisions.

First, I have some issues with using a 10-year old version of WRF model, but this can be rectified by providing an associated meteorological evaluation to verify usage to drive the CMAQ model. Also, it wasn't entirely clear if 2020 meteorology was actually used in the WRF simulations used to drive CMAQ.

Second, I feel there is a lack of a necessary supporting document, which should contain a number of supporting analysis to the main results shown. For example, while there is discussion on the development of COVID-19 transportation-related activity data in the paper (Section 2), I feel these analyses should be shown graphically or in tabular form in a supporting information document. These activity changes are critical to development of COVID-19 related emissions and ozone precursor changes, and eventual ozone formation modeling results.

Third, there appears to be some conflicts with a recent paper on COVID-19 impacts on ozone sensitivity and concentration changes also in the SoCAB region (Parker et al., 2022), which need to be at least discussed and/or rectified as to the major differences. Particularly, two of Parker et al. conclusions are the following:

- “Although meteorology played the major role in the increases in ozone between 2019 and 2020, the reduction in NO<sub>x</sub> emissions due to the response of the COVID pandemic also **caused ozone increases** in Los Angeles County and into western San Bernardino County, with more widespread ozone decreases further east.”
- “Ozone formation in parts of the **SoCAB is still VOC-sensitive**, and the locations where NO<sub>x</sub> reductions cause ozone increases occur in areas with some of the highest population density in the SoCAB”.

Which conflict somewhat with the conclusions of this present paper, such as:

- “Model simulations performed with base-case and COVID-adjusted emissions capture this change to a NO<sub>x</sub>-limited environment and suggest that COVID-related emissions reductions were responsible for a **0-2 ppb decrease in O<sub>3</sub>** over the study period.”
- “Historical trend analysis from two indicators of O<sub>3</sub> sensitivity (the satellite HCHO/NO<sub>2</sub> ratio and the O<sub>3</sub> weekend/weekday ratio) revealed that Spring of 2020 was the first year on record to be **on average NO<sub>x</sub>-limited**, while the “transitional” character of recent Summers became NO<sub>x</sub>-limited due to COVID-related NO<sub>x</sub> reductions in 2020.”

While I tend to agree more with the present study findings because they explored the ozone formation/sensitivity using a combination of satellite data, surface monitors, and models, some discussion and comparison on the different conclusions reached in these two studies are necessary here, likely in the “Discussion” section. This also could be rectified by expanding the modeling analysis to show COVID19-Baseline results spatially across the SoCAB. There are also some similarities between studies, such as both finding that warmer than average temperatures in the SoCAB played a major role in ozone increases during the COVID-19 lockdown periods of spring/summer 2020. Please review carefully and provide additional analysis and discussion.

Parker, L.K.; Johnson, J.; Grant, J.; Vennam, P.; Parikh, R.; Chien, C.-J.; Morris, R. Ozone Trends and the Ability of Models to Reproduce the 2020 Ozone Concentrations in the South Coast Air Basin in Southern California under the COVID-19 Restrictions. *Atmosphere* 2022, 13, 528. <https://doi.org/10.3390/atmos13040528>.

*Specific Comments:*

1. Lines 51-53: Please provide a list of citations/references to support these arguments.
2. Lines 81-83: A new study by Parker et al. (2022) should also be listed here (see General Comments above):

Parker, L.K.; Johnson, J.; Grant, J.; Vennam, P.; Parikh, R.; Chien, C.-J.; Morris, R. Ozone Trends and the Ability of Models to Reproduce the 2020 Ozone Concentrations in the South Coast Air Basin in Southern California under the COVID-19 Restrictions. *Atmosphere* 2022, 13, 528. <https://doi.org/10.3390/atmos13040528>.

Furthermore, while not focused on the SoCAB, Campbell et al. (2021) found high spatiotemporal variability in ozone changes (including southern California) during the COVID-19 periods of Spring/Summer 2020 in the U.S. This may be included as well.

Campbell, P. C., D. Tong, Y. Tang, B. Baker, P. Lee, R. Saylor, A. Stein, S. Ma, and L. Lamsal (2021). Impacts of the COVID-19 Economic Slowdown on Ozone Pollution in the U.S. *Atmospheric Environment*, <https://doi.org/10.1016/j.atmosenv.2021.118713>.

3. Lines 104-105: Should at least these independent VMT dataset calculations be shown as a supporting figure for the reader to get an understanding of how the activity trends change during COVID-19 lockdowns?
4. Lines 114-115: Similar to Comment 3, I think the heavy-duty truck trip trend comparisons of WIM vs. Geotab should be shown, at least as supporting figures.
5. Lines 116-119: Again, this activity data would be valuable information to show as supporting tables. Please revise.
6. Lines 126-127: If EMFAC2017 forecasts the emissions for 2020, how can it determine that “94% of the total VMT in California is from light-duty vehicles in 2020”. Wouldn’t actual data (not projections) be needed to determine this percentage *in* 2020?
7. Line 164: There needs to be at least a supporting information figure showing the domain configuration/coverage.
8. Lines 165-166: More information is needed on what “Default CMAQ initial conditions” actually represents. Please revise and expand briefly on this.
9. Lines 170-171: I am concerned that a version of WRFv3.4, which is now 10 years old since release date, is used as the driving meteorology. While I understand the difficulty in always trying to stay state-of-the-science with model versions, I think there should be some effort to at least stay up-to-date with major version changes (i.e. WRVv4). Particularly at high resolution within complex terrain of the west for example, the use of default hybrid terrain-following vertical coordinate in WRFv4 can make an impact on results.

With that in mind, I would accept the following as a response to this issue: Include a meteorological evaluation of the WRFv3.4 results, and thus verify and discuss in the paper that use of this WRFv3.4 configuration is acceptable to drive CMAQ here.

10. Lines 171-173: The three nested WRF model domains should be shown in a figure, and the major WRF model physics selected should be included somewhere in the text or associated table.

Also, this pertains to a comment below, but was a WRF simulation conducted for the year 2020? What were used for the meteorological initial and boundary conditions, and what year?

Please be explicit with all this information, and if 2020 meteorology was not used in WRF, then why and what are the potential impacts?

11. Line 173: Need to define MCIP acronym and further provide a citation/reference.

12. Lines 209-213: Why is applying ground-based NO<sub>2</sub> observations and the bottom-up VMT data (from Section 3.1.1) implied here as a “top-down” estimate of NO<sub>2</sub> changes? In my opinion, this also leads to a misleading title of this section. Please explain and revise.

13. Lines 215-217: I have some issues with this model being trained on NO<sub>2</sub> surface observations, which are known to have systematic issues with interference from other species (e.g., NO<sub>y</sub>; see Dickerson et al. 2019). I think at least some discussion is needed on this and how it may (or may not in this case) limit the interpretation of the linear model results and upper/lower bounds used to estimate the  $\Delta$ NO<sub>2</sub> resulting from emissions changes due to pandemic response.

Dickerson, R.R.; Anderson, D.C.; Ren, X. (2019). On the use of data from commercial NO<sub>x</sub> analyzers for air pollution studies. *Atmos. Environ.*, 215.  
<https://doi.org/10.1016/j.atmosenv.2019.116873>.

14. Lines 236-237: This is confusing, as it seems that this is stating that 2020 meteorology wasn't used in the WRF-CMAQ simulations. However, Section 2.5 states that 2020 WRF meteorology was indeed used, and thus seems to conflict with this statement.

This also affects the conclusion that if 2020 met wasn't used, it suggests the derived 2020 CMAQ emissions were reasonable. If indeed 2020 meteorology wasn't used in the WRF-CMAQ simulations, then this brings up a larger issue as to why this was the case, and why it is not clearly explained in Section 2.5 (See previous comment # 10 above). Please clarify and revise.

15. Lines 260-262: To avoid the issue of biogenic seasonality impacts on the HCHO/NO<sub>2</sub>, why not also use the more robust O<sub>3</sub>/NO<sub>y</sub> photochemical indicator? I believe while more sparse, there are NO<sub>y</sub> observations available in the SoCAB.

16. Lines 293-300: There appears to be conflicts in the WE/WD ratio and discussion. On lines 293-294, it is stated “In Figure 7, blue colors (i.e. weekend O<sub>3</sub> higher than weekday O<sub>3</sub>) are indicative of locally VOC-limited conditions, whereby reductions in NO<sub>x</sub> on weekends coincided with higher ambient O<sub>3</sub>.” While on lines 299- 300 it states “Summer of 2005 – 2014 was generally VOC-limited with most monitors having WE/WD ratios below 1. However, by Summer of 2015 – 2019, many monitoring sites had WE/WD ratios above 1, indicative of NO<sub>x</sub>-limited conditions.” From what I understand, WE/WD > 1 → VOC-limited and WE/WD < 1 → NO<sub>x</sub>-limited.

17. Lines 332-334: As noted above, an additional evaluation of the simulated meteorology is needed to be confident of the use of WRF modeling to disentangle effects of emissions, chemistry, *and meteorology*.

18. Lines 350-351: Or, this also could be due to high uncertainty in the emissions used for the 2020 COVID-19 period.
19. Lines 362-363: Again, a meteorological evaluation is needed to verify this argument, and it is not clear if the author is referring to an overprediction of WRF clouds/precipitation which may lead to the larger model NO<sub>2</sub> underpredictions in second and third weeks of March. The argument "...when there was rain." is too vague and does not provide enough information on the impact/evaluation of simulated meteorology related to the agreement of modeled NO<sub>2</sub> and observations.
20. Lines 370-371: Same as in #19 above. How did the simulated WRF meteorology capture these events, and how does this relate to the NO<sub>2</sub> and ozone biases?
21. Lines 377-378: OK, there is some mention of WRF met evaluation here, but nothing is shown in the paper, and thus it needs to be expanded upon, e.g., provided as similar diurnal time series plots.
22. Lines 380-384: While the time series analysis averaged over the SoCAB is nice, I think it is limited and does not show the spatial differences between COVID-Baseline across the SoCAB from the model. As shown in Parker et al. (2022), their work shows a distinct gradient in modeled MDA8 ozone due to reduced COVID-19 emissions (see Figure 10 of their work, reproduced below), which indicates for June 01 - July 31 the reduction in NO<sub>x</sub> emissions caused ozone increases in Los Angeles County and into western San Bernardino County, with more widespread ozone decreases further to the east in the SoCAB. From this standpoint, as mentioned above in the general comments, there seems to be a conflict between results; however, it would be easier to rectify this if a spatial difference plots across the SoCAB are included in the current paper.

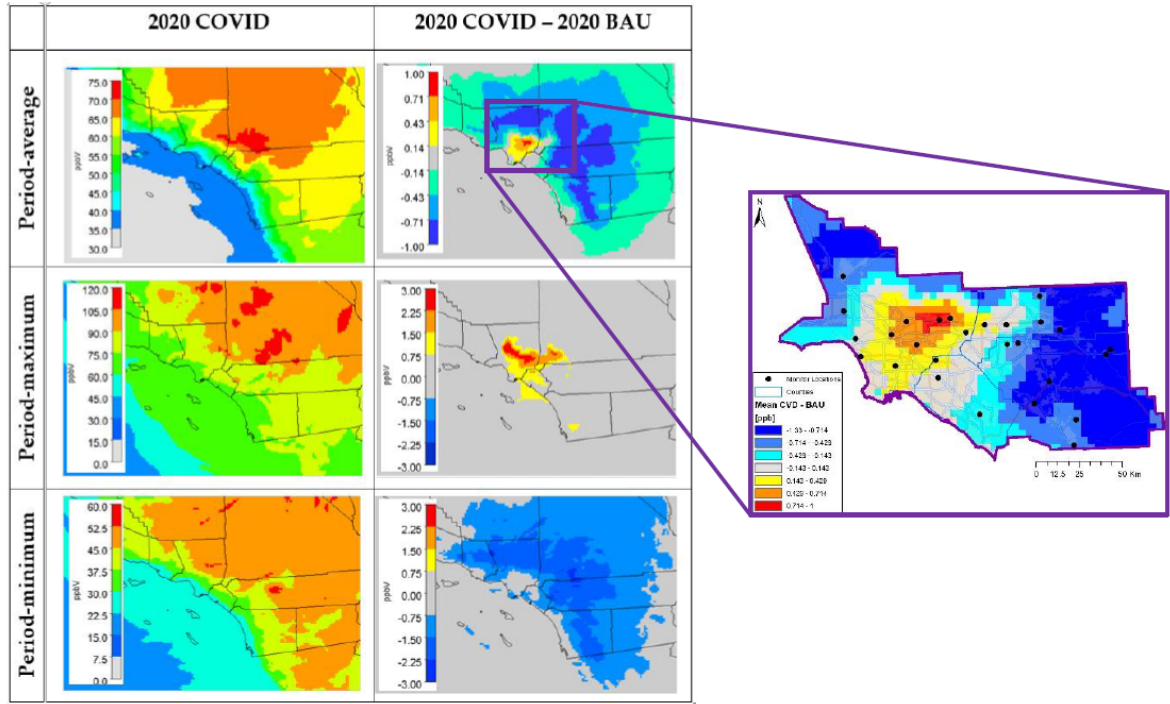

(a)

(b)

**Figure 10.** June 1 – July 31 impacts of the COVID-19 emissions reductions on ozone, estimated by CMAQ: (a) Period average, period maximum, and period minimum MDA8 ozone spatial maps for 2020 COVID and 2020 COVID minus 2020 BAU; (b) Close up of period-average 2020 COVID minus 2020 BAU for SoCAB.

[Ozone Trends and the Ability of Models to Reproduce the 2020 Ozone Concentrations in the South Coast Air Basin in Southern California under the COVID-19 Restrictions](#)

Lines 414 - 446: It is here in this discussion that the new results of Parker et al. (2022) commented on above can, and should be included compared to the present results.

Technical corrections:

1. Line 112: Seems like a typo: “for the station the 710 freeway,”.
2. Line 131: Typo: “COIVID-19” should be “COVID-19”.
3. Line 139: Typo: “O3” should be “O<sub>3</sub>”
4. Line 141: Typo: “Wednsedays” should be “Wednesdays”
5. Line 180: Typo: “Due a lack of...” should be “Due to a lack of..”
